# Supplementary material
Source: Springer Nature journal article supplement (https://www.springermedizin.de/resource/supplementary/12913_2009_1138_MOESM1_ESM.pdf/9527662)

**Hospital**

**Primary health care**

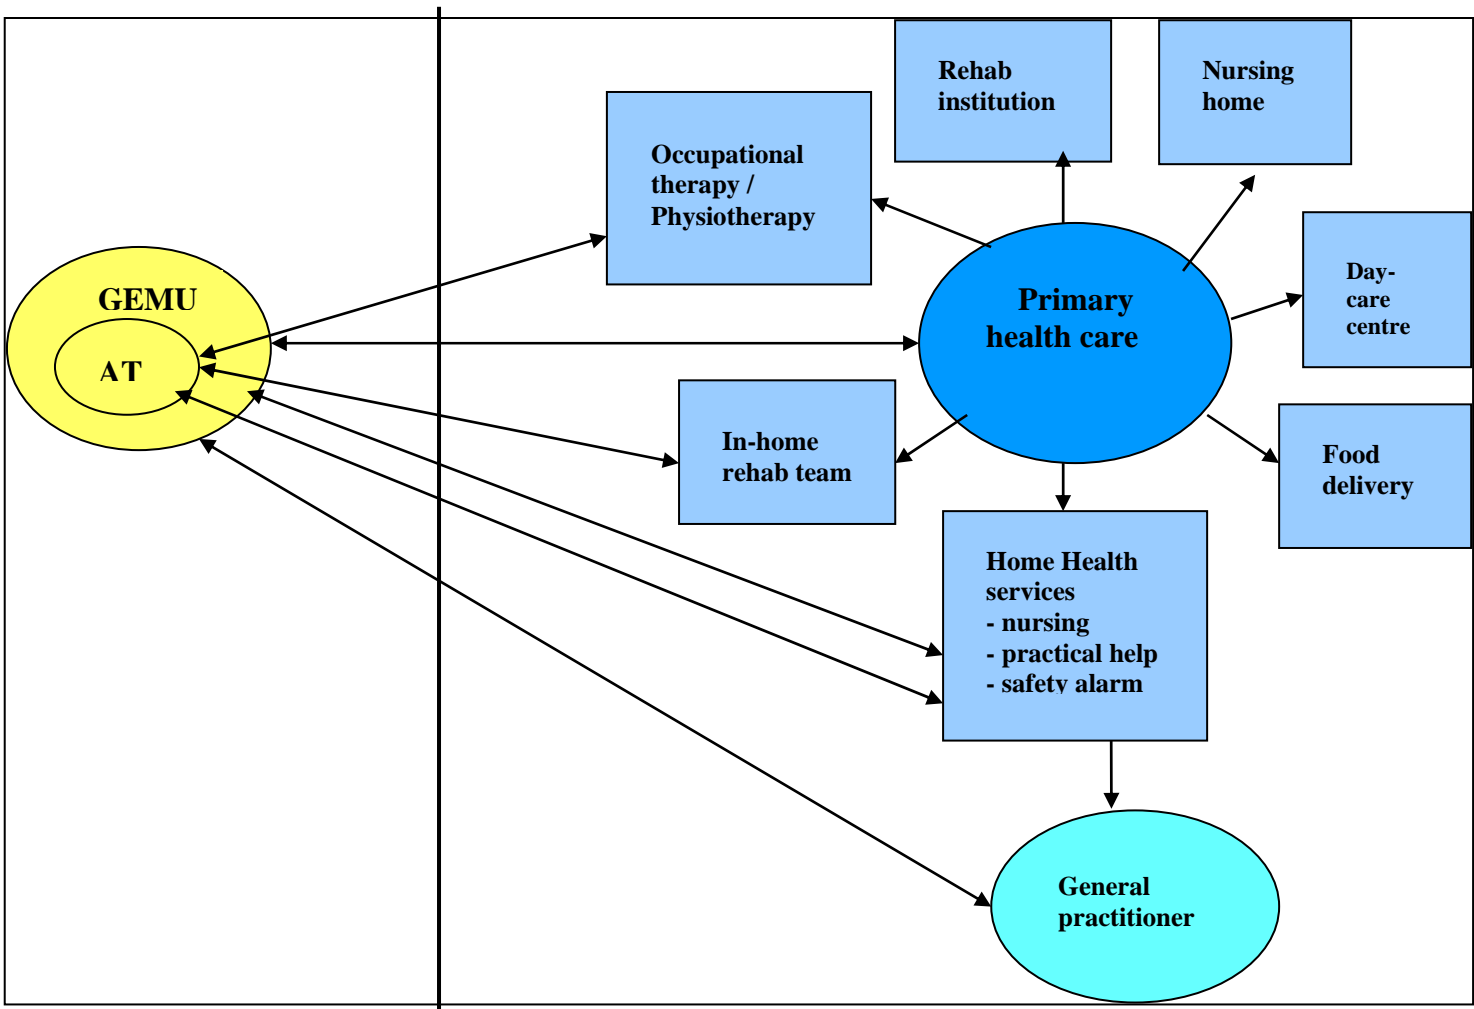

Supplement: MOESM1 [file 9527662]
